1 **Use of the swim bladder and lateral line in near-field sound source localization by fishes**

2

3 Allison B. Coffin<sup>1,2†\*</sup>, David G. Zeddies<sup>3\*</sup>, Richard R. Fay<sup>4</sup>, Andrew D. Brown<sup>5◇</sup>, Peter W. Alderks<sup>6</sup>, Ashwin  
4 A. Bhandiwad<sup>6</sup>, Robert A. Mohr<sup>6</sup>, Michael D. Gray<sup>7</sup>, Peter H. Rogers<sup>7</sup>, and Joseph A. Sisneros<sup>1,6,8</sup>

5

6 <sup>1</sup> Virginia Merrill Bloedel Hearing Research Center, University of Washington, Seattle, WA 98195

7 <sup>2</sup> Department of Otolaryngology – Head and Neck Surgery, University of Washington, Seattle, WA 98105

8 <sup>3</sup> JASCO Applied Sciences, Silver Spring, MD 20902

9 <sup>4</sup> Marine Biological Laboratory, Woods Hole, MA 02543

10 <sup>5</sup> Department of Speech and Hearing Sciences, University of Washington, Seattle, WA 98105

11 <sup>6</sup> Department of Psychology, University of Washington, Seattle, WA 98195

12 <sup>7</sup> George W. Woodruff School of Mechanical Engineering, Georgia Institute of Technology, Atlanta, GA  
13 30332

14 <sup>8</sup> Department of Biology, University of Washington, Seattle, WA 98195

15 \* denotes equal first author contribution

16 † present address: Washington State University Vancouver, Vancouver, WA 98686

17 ◇ present address: University of Colorado School of Medicine, Aurora, CO 80045

18

19

20

21

22

23

24

25

26

27

28

29  
30  
31  
32  
33  
34  
35  
36  
37  
38  
39  
40  
41  
42  
43  
44  
45  
46  
47  
48  
49  
50  
51  
52  
53  
54  
55  
56**ABSTRACT**

We investigated the roles of the swim bladder and the lateral line system in sound localization behavior by the plainfin midshipman fish (*Porichthys notatus*). Reproductive female midshipman underwent either surgical deflation of the swim bladder or cryoablation of the lateral line and were then tested in a monopolar sound source localization task. Fish with nominally “deflated” swim bladders performed similar to sham-deflated controls; however, post-experiment evaluation of swim bladder deflation revealed that a majority of “deflated” fish (88%, 7 of the 8 fish) that exhibited positive phonotaxis had partially inflated swim bladders. In total, 95% (21/22) of fish that localized the source had at least partially inflated swim bladders, indicating that pressure reception is likely required for sound source localization. In lateral line experiments, no difference was observed in the proportion of females exhibiting positive phonotaxis with ablated- (37%) versus sham-ablated (47%) lateral line systems. These data suggest that the lateral line system is likely not required for sound source localization, although this system may be important for fine-tuning the approach to the sound source. We found that midshipman can solve the 180° ambiguity of source direction in the shallow water of our test tank, which is similar to their nesting environment. We also found that the potential directional cues (phase relationship between pressure and particle motion) in shallow water differs from a theoretical free-field. Therefore, the general question of how fish use acoustic pressure cues to solve the 180° ambiguity of source direction from the particle motion vector remains unresolved.

57

**INTRODUCTION**

58

59

60

61

62

63

64

65

66

67

68

69

70

71

72

73

74

75

76

77

78

79

80

81

82

83

84

Fish are well equipped to detect underwater acoustic and vibratory stimuli. Most teleost fishes have both auditory and lateral line systems, and each system is responsive to the local fields produced by acoustic/vibratory sources. These systems are used in a variety of behavioral contexts, including behaviors such as prey detection and mate selection, which necessitate sound source orientation and localization (Fay, 2005; Webb et al., 2008). While several studies have established that some fishes can determine sound direction and localize underwater sound sources (Schuijff, 1975; Schuijff and Hawkins, 1983; Zeddies et al., 2010; 2012), there is much debate over the mechanism(s) underlying sound source localization ability (see Fay and Simmons, 1999; Rogers and Zeddies, 2008). Sound pressure is a scalar quantity containing no information about direction, and thus is in itself not useful for determining sound source direction. The particle motion component of sound, in contrast, is a vector quantity (containing a directional component) and could thus be useful for determining the direction to a sound source. Fishes possess two systems for particle motion detection, the inner ear and the lateral line (Braun and Coombs, 2000; 2010). Based on his work on the lateral line organs of killifish (*Fundulus heteroclitus*), van Bergeijk suggested that pressure reception by the inner ear allowed for detection of a sound source but that the lateral line system was responsible for supplying directional information (Harris and van Bergeijk, 1962; van Bergeijk, 1967). Years later, the relative contributions of the inner ear and lateral line to particle motion detection and source localization are still not firmly understood.

Particle motion detection by the inner ear alone seems insufficient for signaling the direction to a sound source because the axis of the particle motion vector points both towards and away from the source, meaning there is a "180° ambiguity" that remains unresolved without further information (Fay 2005). In other words, fish sensitive only to particle motion should be able to identify the axis along which the local particle motion lies, but unable to distinguish whether the source is located at one heading or at 180° in the opposite direction. Current models for sound source localization by fish depend on the detection and processing of both the pressure and particle motion components of sound for the resolution of this ambiguity (Fay, 2005). A major assumption of several related hypotheses (Chapman and Hawkins, 1973; Schuijff, 1975), including a dominant hypothesis of sound source localization known as the "phase model" (Schuijff and Buwalda, 1975), holds that fishes are able to use the phase difference of sound

85 pressure and particle motion components to compute the direction to a sound source (resolving the 180°  
86 ambiguity). However, these models assume a far-field pressure-particle velocity relation and require  
87 sinusoidal stimuli. An alternative computational model proposed by Rogers et al. (1988) for resolving the  
88 180° ambiguity also requires that fish both detect sound pressure and particle motion, but works at all  
89 distances from a simple monopole sound source and does not require sinusoidal signals. For sinusoidal  
90 signals, the Schuijf and Rogers models make identical predictions, dependent on the phase difference of  
91 the pressure and particle velocity components.

92 It is highly likely that all fishes are able to detect the particle motion component of sound via the  
93 inner ear otolithic end organs, which function as inertial accelerometers (de Vries, 1950; Dijkgraaf, 1960;  
94 Fay, 1984). Recent behavioral studies with the plainfin midshipman fish (*Porichthys notatus*) show that  
95 these fish can use local acoustic particle motion to locate a sound source (Zeddies et al., 2010; Zeddies  
96 et al., 2012). The extent to which midshipman fish are receptive to sound pressure, or able to resolve the  
97 180° ambiguity problem via pressure reception, is not known. More generally, the role that pressure  
98 reception or the mechanosensory lateral line, which is sensitive to both particle motion and local pressure  
99 gradients (Webb et al., 2008), may play in sound source localization remains empirically untested.

100 Here, we investigate the use of the swim bladder and lateral line in sound source localization by  
101 female plainfin midshipman in the near field, wherein the source distance is less than an acoustic  
102 wavelength and the ratio of pressure to radial particle velocity is a distance-dependent complex-value  
103 smaller in magnitude than the density-sound speed product. Experiments were conducted during the  
104 summer of 2010 on wild-caught females in reproductive condition. Across experiments, stimuli were  
105 simulated advertisement calls of male midshipman fish, which are approximately sinusoidal (Bass, 1992),  
106 and thus well-suited to test the predictions of sound source localization models. Our findings suggest that  
107 (1) pressure reception is likely required for near-field source localization, (2) midshipman can resolve the  
108 180° ambiguity, though the mechanisms for doing so remain obscure, and (3) the lateral line system may  
109 not be necessary for near-field source localization.

110

111

112

113  
114  
115  
116  
117  
118  
119  
120  
121  
122  
123  
124  
125  
126  
127  
128  
129  
130  
131  
132  
133  
134  
135  
136  
137  
138  
139

## RESULTS

### Acoustic field characterization

The spatial characteristics of the acoustic field generated by the J-9 and AQ339 sound projectors were quantified from the tank mapping measurements made with miniature hydrophones (sound pressure) and a tri-axial accelerometer (particle motion). For arcs of constant radius from the source, the azimuthal standard deviation of the pressure at 90 Hz was found to be no more than 10% and 6% for the J-9 and AQ339 projectors, respectively. Standard deviation values at 75 and 80 Hz for the AQ339 were 9% and 6%, respectively. These results confirmed that the sound fields were circumferentially uniform (axisymmetric) within the mapped area of the sound field that contained the fish release points and phonotactic paths of the tested fish.

### Biased and unbiased release experiments

Sound playback experiments were conducted at night in an outdoor cylindrical concrete tank, with initial release sites and the speaker position indicated in Figure 1. In this first experiment, we asked if there was a difference in localization behavior for fish that were released so that their initial swimming direction was biased towards the sound source (biased release) vs. fish that were allowed to leave the release site in any direction (unbiased release). The phonotactic responses displayed in the biased versus unbiased release experiments were unambiguous; positive phonotactic responses entailed repeated contact with the source by the fish (see Zeddies et al., 2010 for descriptions of the phonotactic response). Of the 17 reproductive females tested in the “unbiased” (open) release, 65% ( $n = 11$ ) of the females exhibited a positive phonotactic response. Of the 31 reproductive females tested in the “biased” release experiments, 61% ( $n = 19$ ) exhibited positive phonotactic responses. A logistic regression showed that there was no difference in the proportion of females that exhibited positive phonotactic responses in the biased (61%) release experiments compared to the unbiased (65%) release experiments ( $\beta = 0.14 + 0.67$ ,  $t = 0.23$ ,  $p = 0.82$ ), suggestive that fish were able to resolve the 180° ambiguity.

### Swim bladder deflation experiments

140 Phonotactic responses were next examined in fish with intact or deflated swim bladders to determine  
141 whether the swim bladder was required for near-field sound source localization. Of the 28 reproductive  
142 females with sham-deflated swim bladders, 50% (n = 14) exhibited positive phonotactic responses; the  
143 trajectories these females took after release from site B are shown in Figure 2A. Of the 21 reproductive  
144 females that underwent swim bladder deflation surgery, 38% (n = 8) exhibited positive phonotactic  
145 responses (see Figure 2B). An initial logistic regression analysis indicated no difference in the proportion  
146 of females with “deflated” (38%) and sham-deflated (50%) swim bladders that exhibited positive  
147 phonotaxis ( $\beta = 0.49 \pm 0.59$  SE,  $t=0.83$ ,  $p = 0.41$ ). However, upon postmortem examination of the fish that  
148 underwent swim bladder deflation surgery, we found that 12 (out of 21) had partially (25 to 50%) to nearly  
149 completely (>90%) inflated swim bladders. The observation of partial swim bladder inflation within 24h  
150 post deflation surgery (and <12h post-test) suggests rapid re-inflation of the swim bladder in this subset of  
151 animals. We thus compared, post-hoc, fish with re-inflated swim bladders (fish with greater than 25%  
152 swim bladder re-inflation, n=12) against those with still-deflated swim bladders (fish with 100% swim  
153 bladder deflation). Whereas 58% (n=7) of “re-inflated” fish exhibited positive phonotaxis – a proportion not  
154 significantly different from that in sham-deflated controls ( $\beta = -0.34 \pm 0.67$  SE,  $t = 0.48$ ,  $p = 0.68$ ) - only  
155 one of nine “still-deflated” fish exhibited positive phonotaxis – a proportion significantly lower than in the  
156 re-inflated sub-group ( $\beta = 2.41 \pm 1.21$  SE,  $t=1.99$ ,  $p < 0.05$ ). In sum, we found that 95% (21/22) of fish  
157 that localized the source had at least partially inflated swim bladders, indicating that pressure reception is  
158 likely required for sound source localization.

159

## 160 Lateral line ablation experiments

161

### Morphology

162 Phonotaxis responses were next examined in fish with ablated lateral line systems in order to determine  
163 the relative contribution of the lateral line to source localization. Lateral line ablation was achieved with a  
164 liquid N<sub>2</sub>-dipped probe. Cryoablation success was qualitatively verified with DASPEI in a subset of fish  
165 immediately after sound source localization experiments were performed (see Figure 3 for an illustration  
166 of lateral line morphology). DASPEI-labelled neuromasts were present in stereotyped patterns on the  
167 head, trunk, and tail of intact and sham-ablated fish, while DASPEI labelling was largely absent from

168 neuromasts in ablated fish (Fig. 4). Only SN could be verified in this way due to the dark skin  
169 pigmentation of the skin that obscured CN visualization, and due to the superglue over the canals in  
170 ablated animals. SN ablation was quantified in fixed FM 1-43FX-labelled animals as described in the  
171 methods (Fig. 5, Table 1). Regions used for quantification are indicated in Fig. 3. There were  $16.1 \pm 6.7\%$   
172 SN remaining (mean  $\pm$  S.D.) in liquid N<sub>2</sub>-ablated, FM-labelled fish (n = 9 fish, 177-254 SN quantified per  
173 fish), with the highest percentage of intact neuromasts observed on the mandible ( $38.9 \pm 15.8\%$ ) and the  
174 lowest percentage seen on the dorsal trunk line ( $4.9 \pm 6.3\%$ ) (Table 1). Two fish with 17.4% and 9.6%  
175 intact SN failed to localize the sound source, while a fish with only 6.8% remaining SN localized the  
176 sound source, suggesting that the positive phonotaxis seen in many of the ablated fish was not due to  
177 excess intact neuromasts.

178 Neuromast structure was visualized in both SN and CN using phalloidin labelling, as shown in  
179 Figure 6. The small papillae are clearly visible in intact SN, with a patch of hair bundles lying between the  
180 two papillae (Fig. 6 A, B). Intact CN are larger and have many more hair bundles than SN (compare Fig.  
181 6B and 6C) and lack peripheral papillae. These papillae are damaged in ablated SN and the hair bundles  
182 and surrounding epithelial layer are absent (Fig. 6 D, E). Ablated CN are recognized by the epithelial  
183 morphology surrounding the usual hair-cell containing region (Fig. 6F). Intact CN were occasionally  
184 detected in ablated fish at a frequency of approximately 1 intact CN per animal, however, CN were not  
185 quantified as we could not be certain that some were not damaged during postmortem dissection. It is  
186 unlikely that the few remaining CN in ablated fish received any stimulation due to the superglue that  
187 obstructed the incurrent and excurrent openings to the canals.

188

### 189 **Localization Behavior**

190 Of the 35 reproductive females that had their lateral line system ablated, 37% (n = 13) exhibited positive  
191 phonotactic responses. The pathways these females took after release from site A are shown in Figure  
192 7A. Of the 15 reproductive females that had sham-ablated lateral lines (photophores only), 47% (n = 7)  
193 exhibited positive phonotactic responses. Swimming pathways for these fish after release from site A are  
194 shown in Figure 7B. Because some experiments were conducted the day after lateral line ablation, a  
195 hierarchical logistic regression was performed to control for the effect of day. There was a significant

196 increase in response on the day after lateral line ablation in both lateral line ablated (28% on Day 1, 55%  
197 on Day 2) and sham ablated animals (28% on Day 1, 50% on Day 2) ( $\beta = 1.75 + 0.75 \text{ SE}$ ,  $t = 2.33$ ,  $p =$   
198  $0.02$ ). However, controlling for the effect of day, there was no difference in the proportion of females with  
199 ablated- (37%) and sham ablated (47%) lateral lines that exhibited positive phonotaxis ( $\beta = 0.67 + 0.69$   
200  $\text{SE}$ ,  $t = 0.97$ ,  $p = 0.33$ ). A mean vector analysis of the swimming pathways at the initial release showed  
201 that the direction of movement was biased towards the sound source ( $p < 0.001$  for both ablated- and  
202 sham-ablated lateral line females).

203 The angles that the positive phonotactic fish took (after released from site A) were compared for  
204 females with ablated- and sham-ablated lateral line systems. The mean orientation error relative to the  
205 source was significantly different at the initial release for lateral line-ablated females (mean orientation  
206 error =  $39.0^\circ$ ) compared to lateral line sham-ablated females (mean orientation error =  $15.3^\circ$ ) (Watson-  
207 Williams test,  $F(1, 18) = 6.3$ ,  $p < 0.025$ ). In addition, the mean orientation relative to the source at the  
208 midpoint of the phonotactic pathway taken was also significantly different for lateral line-ablated females  
209 (mean orientation error =  $33.4^\circ$ ) compared to lateral line sham-ablated females (mean orientation error =  
210  $12.8^\circ$ ) (Watson-Williams test,  $F(1, 18) = 6.39$ ,  $p < 0.025$ ).

211

212

## DISCUSSION

213 The plainfin midshipman fish is a good model to explore how fishes localize underwater sound  
214 sources (Zeddies et al., 2010; 2012), in part because reproductive females exhibit robust phonotactic  
215 responses to the underwater acoustic playback of natural and synthetic male advertisement calls (Bass et  
216 al., 1999; McKibben and Bass, 2001). Previously, we demonstrated that the plainfin midshipman fish can  
217 use local acoustic particle motion to guide the animal to a sound source (Zeddies et al., 2010; 2012), but  
218 the contribution of swim bladder pressure cues and the mechanosensory lateral line to sound source  
219 localization remained unresolved. Thus, the primary objective of this study was to determine whether the  
220 swim bladder and/or the lateral line were required for near-field sound source localization. Our findings  
221 suggest that pressure reception is likely required for near-field source localization, that fish can solve the  
222  $180^\circ$  ambiguity inherent in the particle motion vector, and that the lateral line system is likely not  
223 necessary for near-field sound source localization. It is important to note, however, that these



224 experiments were performed in a benthic species that inhabits an extreme shallow-water environment  
225 (during the breeding season), and therefore our results may not pertain to all fishes, especially pelagic  
226 species that live in the water column.

227

### 228 **Sound pressure reception and resolving the 180° ambiguity**

229 During an acoustic disturbance, an infinitesimal “particle” of fluid undergoes a small linear  
230 displacement of oscillating polarity. In the present case, with an axisymmetric sound field, the particle  
231 motion vector alternately points towards and away from the acoustic source for equal amounts of time.  
232 Therefore, this particle motion vector does not indicate which direction along the line to follow in order to  
233 reach the source, giving rise to the so-called 180° ambiguity in particle motion. The behavioral capacity  
234 for directional-dependent hearing in fish has been demonstrated (e.g., directional masking in Atlantic cod  
235 *Gadus morhua*, Hawkins and Sand, 1977; sound source localization in plainfin midshipman, Zeddies et  
236 al., 2010; 2012), but there were no data to demonstrate that fish solve the 180° ambiguity problem during  
237 sound source localization. In the present study we found no difference in the positive phonotactic  
238 response rate when fish were allowed to swim in any direction upon release (“unbiased” release) versus  
239 when they were directed toward the sound source upon release (“biased” release). We also found that  
240 the positive response rate was > 60% in both release cases. If fish could not solve the 180° ambiguity,  
241 biasing their release toward the source would be expected to increase the positive phonotactic response  
242 rate relative to that for the unbiased release, since in the unbiased condition, fish able to detect the  
243 source axis but unable to determine “front” from “back” would be expected to swim *away* from the source  
244 on ~half of trials. Moreover, no fish were observed to exit away from the sound source and then correctly  
245 turn and move to the sound source (Figure 2). Therefore, because the positive phonotactic response rate  
246 was the same in both release conditions, and the positive response rate in the unbiased situation was  
247 >60%, we suggest that midshipman effectively resolve the 180° ambiguity problem during sound source  
248 localization. While is true that a subset of fish in all experiments failed to localize the sound source, the  
249 majority of these fish did not swim 180° in the opposite direction, as would be expected if they were  
250 motivated to locate the source but could not solve the 180° ambiguity. Instead, some of the non-localizing

251 fish remained at the release site, while the others swam in various directions towards the edges of the  
252 tank, at which point the trial was terminated.

253         The relationship between particle motion and pressure is central to hypotheses concerning the  
254 basis of sound source localization by fish, notably the “phase model” suggested by Schuijf and Buwalda  
255 (1975) and the more general model of Rogers et al. (1988). In these models, fish must be receptive to  
256 particle motion and pressure in order to solve the 180° ambiguity. To assess the role that pressure  
257 reception may play in sound source localization by midshipman, we attempted to deflate the swim bladder  
258 in a subset of animals. Collectively, 95% of fish (21/22) that exhibited a positive phonotactic response had  
259 at least partially inflated swim bladders (7 re-inflated, 14 sham deflated), while only a single fish with a  
260 fully deflated swim bladder (1/9) exhibited a positive phonotactic response. Taken together, these results  
261 suggest that sound pressure is likely an important cue used in sound source localization by these fish.  
262 The overall reduction in phonotaxis and sound localization in fish with intact or re-inflated swim bladders  
263 compared to females in previous studies (Zeddies et al. 2010, 2012) is likely due to the after effects of  
264 anesthesia and the observed reduction in swimming behavior in recently anesthetized midshipman that  
265 were surgically manipulated, a phenomenon also seen in the lateral line ablation experiments (J.A.S. and  
266 A.B.C., data not shown).

267         Although it is apparent that sound pressure is used for source localization by the plainfin  
268 midshipman fish, it is not clear how the pressure cue is used to solve the 180° ambiguity problem. The  
269 “phase model” (Schuijf and Buwalda, 1975) was developed based on experiments using approximately  
270 planar wave conditions, wherein sound pressure and radial particle velocity are in phase, having the  
271 same or opposite polarity depending on the direction of propagation. The propagation direction-polarity  
272 relationship persists for the in-phase components of the pressure and particle velocity even in the near  
273 field for a free-field point source. This is the basis of the Rogers et al. (1988) algorithm for resolving the  
274 ambiguity. However, for the propagation conditions in our test tank and for some natural environments,  
275 including the midshipman nesting environment, the phase relationship between sound pressure and  
276 radial particle velocity is more complicated, and can be significantly different from the field of a free-field  
277 point source. We discuss these differences in depth in a modeling study described in the Supplementary  
278 Materials accompanying this paper. In short, our results indicate that if a fish responded correctly to a

279 free-field source (at any range), it would actually respond in the *wrong* direction during phonotaxis in the  
280 non-free-field Bodega Bay tank. Similarly, our propagation models for conditions similar to the natural  
281 nesting environment of the midshipman indicate that if a fish responded in the correct direction for a free-  
282 field point source, it would also respond in the *wrong* direction in the nesting environment at distances  
283 that ranged from 1 cm to 25-50 m depending on bottom type. Ultimately, since female midshipman  
284 consistently exhibited positive phonotaxis in our test tank, we are left to conclude that different source  
285 localization strategies are used in shallow-water versus free-field environments, or that midshipman are  
286 unable to correctly resolve the 180° ambiguity in deep water. Future studies will be required to determine  
287 which of these alternatives is correct and to empirically assess utilization of the directional cues of  
288 acoustic pressure and radial particle velocity during sound source localization by midshipman and other  
289 fish.

#### 291 **Contribution of the lateral line to sound source localization**

292 Fish possess two mechanosensory systems, the ear and the lateral line, which respond to many  
293 of the same stimulus fields (e.g., Coombs et al., 1989; Schellart and Wubbels, 1998; Braun and Coombs,  
294 2000). While early theorists suggested that the lateral line was sufficient for source localization in the  
295 near field, more recent studies demonstrate that vibrating dipole sources elicit physiological and  
296 behavioral responses mediated by both sensory systems, suggesting that either system may be sufficient  
297 for source localization (van Bergeijk, 1967; Nauroth and Mogdans, 2009; Braun and Coombs, 2010;  
298 Coombs et al., 2010). Single-unit recordings from trunk lateral line afferents in plainfin midshipman  
299 demonstrate responses up to 100 Hz, showing that trunk SN are capable of encoding the 75-80 Hz  
300 stimulus used in the present experiments (Weeg and Bass, 2002). However, the question of whether the  
301 lateral line is required for localization behavior in this species had not been previously explored.

302 In our experiments, animals were released approximately 86 cm from an 80 Hz sound source,  
303 i.e., under near-field conditions in which both the inner ear and lateral line may be stimulated (e.g., Braun  
304 and Coombs, 2000). We observed no statistical difference in sound source localization by animals with  
305 sham-ablated lateral lines as compared to those where the lateral line was ablated with liquid N<sub>2</sub>. These  
306 data thus suggest that the lateral line is likely not required by this species for source localization in an

307 axisymmetric sound field. Because we never achieved 100% ablation, it is theoretically possible that the  
308 remaining neuromasts were sufficient for localization behavior. We consider this hypothesis unlikely  
309 because ablation was usually successful over much of the animal, and the propensity for positive  
310 phonotaxis did not appear to be related to the proportion of surviving neuromasts (e.g., the animal with  
311 the greatest number of surviving neuromasts, 17.6%, failed to localize the source). Nonetheless, we  
312 cannot exclude the possibility that a few surviving neuromasts may be sufficient for source localization.  
313 Intact neuromasts were most commonly detected along the ventral mandible (see Table 1); thus, if the  
314 lateral line is used for localization, the mandibular SN could be involved. Other regions, such as the  
315 dorsal trunk line, would not appear to be necessary, given that 100% of dorsal trunk SN were ablated in  
316 some fish that demonstrated localization behavior (Table 1).

317 Interestingly, while females with ablated lateral lines demonstrated positive phonotactic  
318 responses, there was a significant difference in the mean orientation error (relative to the sound source)  
319 of the ablated versus sham-ablated fish. These results suggest a possible role for the lateral line in  
320 localization accuracy and imply complementary or synergistic roles for the lateral line and inner ear in  
321 source detection (e.g., Braun et al., 2002). Perhaps the lateral line is not indispensable for localization in  
322 this context, but is instead used to fine-tune the approach to the target. In the mottled sculpin (*Cottus*  
323 *bairdii*), the lateral line mediates orienting behavior to prey, and subtle differences in strike feeding were  
324 noted in two predatory fish species (muskellunge *Esox masquinongy* and largemouth bass *Micropterus*  
325 *salmoides*) when the lateral line was inactivated with cobalt chloride (New and Kang, 2000; Coombs et  
326 al., 2001; Braun and Coombs, 2010). These studies provide behavioral evidence that the lateral line  
327 provides information important for orienting behaviors, consistent with the subtle differences in orientation  
328 to the sound source we observed in midshipman.

329

330

### Conclusions

331 In this study, the plainfin midshipman fish was used as a general model to investigate the use of swim  
332 bladder pressure cues and lateral line mechanosensory information in near-field sound source  
333 localization. Our findings suggest that pressure reception via the swim bladder is likely important while the  
334 lateral line system may not be required for sound source localization. Our results show that the

335 midshipman can solve the 180° ambiguity in a complex field where the potential directional cues (phase  
336 relationship between pressure and particle motion) are the opposite to what they would be in a free field  
337 and suggest, therefore, that whatever strategy the female midshipman uses to correctly resolve the 180°  
338 ambiguity in our test tank or in the extremely shallow nesting environment would yield an incorrect  
339 resolution in a deep water free-field environment. Therefore, the question of how fish use acoustic  
340 pressure cues to solve the 180° ambiguity of source direction from the particle motion vector remains  
341 unresolved.

342

## 343 MATERIALS AND METHODS

344

### 344 Experimental animals

345 One hundred forty-six adult, reproductive female plainfin midshipman fish (*Porichthys notatus*- Girard  
346 1854) were collected during the summer midshipman reproductive season (May and June 2010). Fish  
347 were collected from the nests of type I males (Sisneros et al., 2009) during the morning low tides in the  
348 intertidal zone of Tomales Bay near Marshall, CA, USA, which is the same geographical location used in  
349 previous studies (Zeddies et al., 2010; 2012). Gravid females were visually distinguishable from type I  
350 and II males based on the distended appearance of the abdomen due to the presence of eggs (Bass,  
351 1996; Bass et al., 1999). Collected fish were transported in coolers with aerated seawater from the field to  
352 the Bodega Marine Laboratory (BML) in Bodega Bay, CA, USA. At BML, the fish were maintained in large  
353 communal tanks at natural ambient temperatures (12-14°C) until later that night when experiments were  
354 conducted. All experimental procedures were approved by the University of California Davis Institutional  
355 Animal Care and Use Committee.

356

357

### 357 Experimental tank and setup

358 All localization experiments were conducted at BML in an outdoor cylindrical concrete tank (4 m diameter,  
359 0.75 m height), the same tank used in previous studies (McKibben and Bass, 1998; 2001; Zeddies et al.,  
360 2010; 2012). A sound source (Lubell AQ339, Clark Synthesis, Littleton, CO, USA or a US Navy J-9  
361 transducer) was suspended in the center of the tank and positioned 10 cm above the tank floor. Note that  
362 two different sound sources were used for these experiments because the J-9 transducer was

363 unavailable for the lateral line ablation experiments. When using the AQ339, it was positioned with its  
364 radiating face oriented vertically. When using the J-9, the face of the projector was positioned such that it  
365 was oriented away from the tank center. A 2.44 m opaque plastic tarp was placed immediately in front of,  
366 but not touching, the sound projector to prevent possible visual cues of the projector that might affect  
367 sound source localization behavior.

368         The acoustic playback signal consisted of a continuous tone that mimicked the fundamental  
369 frequency of the male advertisement call, as this stimulus elicits robust positive phonotaxis in gravid  
370 female plainfin midshipman fish (Bass et al., 1999; Bass and McKibben, 2003). The playback signal used  
371 was either 75 or 80 Hz, based on the ambient temperature of the water in the tank; as previous studies  
372 report that female midshipman show a temperature-dependent frequency preference in their phonotactic  
373 responses (McKibben and Bass, 1998). While temperature may also influence auditory sensitivity in  
374 some fish species (Wysocki et al., 2009), in the present experiment both control and experimental  
375 animals were tested on a given night using the same temperature parameters, allowing for comparisons  
376 between treatment groups. The acoustic playback stimuli were generated by an Agilent 33120A function  
377 generator and passed through a Krohn-Hite 3550 filter (30 – 500 Hz bandpass) to a power amplifier  
378 (Crown Audio Inc., Elkhart, IN) that drove the sound projector. Acoustic pressure levels were verified  
379 nightly prior to behavioral experiments by placing a hydrophone (model 8103, Brüel and Kjaer, Norcross,  
380 GA, USA, or model BM8178-7, Sonatech, Santa Barbara, CA, USA) at one of the two sites within the tank  
381 where fish would be released (Fig. 1). The tone level at the calibration site was set at 130 dB (re 1  $\mu$ Pa  
382 peak), consistent with sound pressure levels of the advertisement calls recorded near the nests of type I  
383 males (Bass and Clark, 2003).

384         The behavioral responses of female midshipman fish were recorded using a digital video recorder  
385 and a CV110 Precision black-and-white camera (0.2 lux minimum light level) mounted approximately 6 m  
386 above the outdoor test arena. The video recordings were digitized using a Vixia HV30 camcorder (Canon  
387 Inc.) and iMovie 7.0 software (Apple Inc., Cupertino, CA, USA). Windows Movie Maker 5.0 (Microsoft,  
388 Redmond, WA, USA) and SigmaScan Pro 5.0 (Systat Inc., Chicago, IL, USA) were used for frame-by-  
389 frame analysis of the digitized video records. Every fifth frame was analyzed by marking the position of  
390 the animal's head (on the midline between the two eyes) relative to the fixed position of the sound

391 projector. The x and y coordinates of the animal's head were then used to track the movement of the  
392 animal in relation to the sound source and sound field.

393

394

### Acoustic measurements

395 In order to characterize the fields produced by the J-9 and AQ339 sound projectors, acoustic pressure  
396 and particle motion measurements were made following procedures described in previous studies  
397 (Zeddies et al., 2010; 2012). Pressures were measured using miniature hydrophones (Brüel & Kjaer  
398 model 8103; Norcross, GA), and particle motions were measured using a tri-axial accelerometer (PCB  
399 model W356A12; PCB Piezotronics, Inc., Depew, New York) that was made neutrally buoyant by  
400 embedding it in syntactic foam. Sensor signals were conditioned (Brüel & Kjaer model 2692 and PCB  
401 Model 482A amplifier for the hydrophones and accelerometer, respectively), digitized and stored on a  
402 Windows-based computer. Using these sensors, the acoustic fields were mapped in a horizontal plane 1  
403 cm below the source center. The scan region spanned the "front" half of the test tank, where all  
404 midshipman sound exposure experiments were conducted.

405

406

### Experimental protocol

407 Sound playback experiments were conducted between 21:00 and 05:00 during May and June in 2010.  
408 Three red floodlights were positioned around the tank perimeter that allowed for the observation and  
409 videotaping of the female midshipman phonotactic responses. The water temperature in the test tank  
410 ranged from 10 to 12° C and was controlled by adjusting the incoming flow rate of seawater to the tank  
411 prior to the behavioral tests. Before testing began each night, the water flow to the test tank was shut off  
412 and water depth was adjusted to 50 cm, a depth typical of natural nests in the field.

413 Female fish were held individually in 5 gallon buckets filled with water from the test tank for at  
414 least 10-15 min prior to testing. Tests began when an individual fish was placed in a 30 cm diameter  
415 plastic mesh cylinder at either release site A or B inside the test tank, approximately 86.5 cm from the  
416 sound source (Fig. 1). Fish were placed in the cylinder while the acoustic stimulus was continuously  
417 playing (no acclimation period). Tests were terminated when the fish swam to the perimeter of the testing  
418 arena or after a positive phonotactic response. A positive response was defined as the point when a fish

419 directly touched the speaker face and/or circled in front of or under the sound projector. Although the  
420 opaque plastic tarp visually obscured the position of the sound source suspended above the tank  
421 substrate, the fish was able to easily swim under the tarp in front of the speaker to reach the source  
422 during positive phonotaxis.

423

424

### **Biased and unbiased release experiments**

425 In most experiments the mesh release cylinder was open at the bottom to allow the fish to swim in any  
426 direction at onset of the test. In some experiments, three quarters of the bottom circumference was  
427 closed off leaving a window for the animals to exit that could be directed toward the sound source. This  
428 “biased” release was used to determine whether midshipman fish were able to resolve the 180° ambiguity  
429 inherent in the particle motion vectors pointing toward (and away from) the sound source: Fish able to  
430 detect the axis of particle motion but unable to resolve the 180° ambiguity would on some trials be  
431 expected to exit the cylinder away from the source in the unbiased (open) release experiments. Initial  
432 phonotaxis away from the source was physically impossible in the biased release experiments. Therefore,  
433 if fish were susceptible to the 180° ambiguity, 180° errors should have occurred at a higher rate given an  
434 unbiased release.

435

436

### **Swim bladder deflation experiments**

437 To investigate the necessity of the swim bladder for sound source localization, a group of female  
438 midshipman underwent surgical swim bladder deflation. Fish were first anesthetized by immersion in a  
439 0.025% benzocaine (ethyl p-aminobenzoate) seawater bath until opercular movement ceased. After the  
440 animal was anesthetized, a small (5-8 mm) incision in the body wall was made followed by another small  
441 (5-6 mm) incision in the swim bladder that allowed the bladder to be deflated. Swim bladder deflation  
442 surgeries were performed on the day of animal collection, and completed within 6 to 12 hours before  
443 animals were used in behavioral experiments, which included a recovery time of at least 3-4 hours before  
444 experiments were performed. Verification of the swim bladder deflation surgeries took place within 12  
445 hours (the next morning) after the behavioral experiments were performed. “Sham-deflated” control fish  
446 were anesthetized and a similar small (5-8 mm) incision was made in the body wall along the trunk of the



447 fish just dorsal to the swim bladder at a position where the bioluminescent photophores are found on the  
448 body. Following surgery, fish were revived by flushing seawater over the gills until opercular movement  
449 resumed and the fish showed normal righting behavior.

450

451

### Lateral line ablation experiments

452 The lateral line was selectively ablated with liquid nitrogen. Fish were anesthetized with a 0.025%  
453 concentration of benzocaine until opercular movement ceased. Small stainless steel or copper wire  
454 probes were dipped in liquid N<sub>2</sub> and applied to the head and body of the fish to specifically ablate the  
455 superficial neuromasts (SN) while the fish was under deep anesthesia. To ablate the canal neuromasts  
456 (CN), canals were first opened with microdissection scissors, then the liquid N<sub>2</sub>-cooled probe was applied  
457 and the canals were re-sealed with super glue (cyanoacrylate). For sham-ablated controls, a subset of  
458 ventral photophores were selectively damaged with liquid N<sub>2</sub> using a procedure otherwise comparable to  
459 the SN ablation technique. Sham-ablated fish were anesthetized for the same period of time as lateral  
460 line-ablated animals. The entire ablation process lasted 30-45 minutes. Fish were then revived by flushing  
461 seawater over the gills until opercular movement resumed and the fish showed normal righting behavior.

462

463

464

465

466

467

468

469

470

471

472

473

474

Ablated fish were active upon recovery from anesthesia but did not show normal behavioral  
escape responses when gently stimulated with a water jet applied to the skin, suggesting that the lateral  
line was not functioning. We noted that deep anesthesia (fish left in benzocaine for a few minutes after  
opercular movement ceased) was preferable to shallow anesthesia (fish removed from benzocaine as  
soon as opercular movement ceased), as fish, after shallow anesthesia, did not swim normally in the  
hours after ablation, either in the recovery tank or the sound localization test tank. Of the 50 animals that  
had ablated and sham-ablated lateral line treatment, 39 fish were tested on the same day of surgery while  
11 fish were tested the day following surgery due to the lethargic swimming response after recovery.  
Post-hoc assessment confirmed that the lateral line remained ablated in fish tested the day following the  
ablation procedure, i.e., lateral line hair cells had not regenerated in the intervening <30 hrs. The lethargic  
response observed in some animals tested shortly after the ablation procedure suggests a potential  
confounding effect of the benzocaine anesthesia and surgical ablation stress.

475 **Lateral line visualization**

476 Ablation success was qualitatively verified in a subset of animals immediately after the behavioral  
477 localization experiment. Fish were immersed in 0.005% DASPEI ((2-{4-(dimethylamino-)styryl}-1-  
478 ethylpyridinium iodide; Life Technologies) in seawater for 15 minutes in order to visualize remaining  
479 neuromasts, rinsed in seawater, and anesthetized in a 0.025% benzocaine bath. Labelling was observed  
480 using a Nikon AZ100 stereomicroscope microscope equipped for epifluorescence and images were taken  
481 with a Coolsnap HQ2 camera (Photometrix) and NIS Elements software. After imaging, animals were  
482 euthanized with an overdose of benzocaine, weighed, measured, and fixed in 4% paraformaldehyde for  
483 subsequent lateral line dissection and labelling with fluorescently-tagged phalloidin.

484 Four regions of SN were selected for phalloidin labelling: a 2 cm region from the right dorsal line  
485 starting anterior to the dorsal fin, a 1 cm region on the top of the head (left side), 1.5-2 cm from the ventral  
486 line (left side) starting at the anterior end of the anal fin, and the entire caudal fin. Given the small number  
487 of CN in this species, all canals were dissected out of the head and labelled rather than selecting discrete  
488 CN regions for sub-sampling. Sampling regions for SN and CN are shown in Fig. 3. Dissected SN or CN  
489 were treated with 20  $\mu\text{g/ml}$  proteinase K for 30 min at 37° C to digest the cupula and increase phalloidin  
490 penetration. Samples were then incubated for 30-40 min in Oregon Green phalloidin (Life Technologies)  
491 diluted 1:100 in 0.1M phosphate-buffered saline (PBS), rinsed in fresh PBS, and mounted in 50% glycerol  
492 on bridged coverslips. Images were taken on an Olympus FV-1000 confocal microscope with associated  
493 Fluoview software. Confocal z-series were compressed into brightest-point projections with ImageJ.

494 After behavioral experiments, the majority of animals were labelled with vital dye for post-fixation  
495 visualization of the lateral line. These animals were immersed in 3  $\mu\text{M}$  FM 1-43 FX (Life Technologies)  
496 for 90 sec, rinsed in salt water, and euthanized with an overdose of benzocaine. Fish were weighed,  
497 measured, and then placed in 4% paraformaldehyde (in PBS) and stored at 4°C. Fixed fish were  
498 transported back to the University of Washington, rinsed in fresh PBS, and the labelled lateral line was  
499 visualized with a Leica MZFLIII stereomicroscope. Images were taken with a Leica DFC350FZ camera  
500 and associated Firecam software (v. 3.2).

501 The number of remaining SN in the FM 1-43-labelled animals was quantified in six distinct  
502 regions of each animal: the right dorsal lateral line adjacent to the dorsal fin, the SN cluster on the dorsal

503 head surface (right side), the ventral line starting anterior to the pelvic fins and extending to just behind  
504 the left pectoral fin, the ventral-most line on the left operculum, the mandibular line, and the entire caudal  
505 fin (see Fig. 2). These regions were selected based on initial observations in DASPEI-labelled animals  
506 that our ablation procedure was highly effective in some lateral line areas (e.g., the dorsal surface of the  
507 head), while other areas were more difficult to access with the frozen probe and therefore contained more  
508 surviving neuromasts (e.g., the mandibular line).

509

### 510 **Data Analysis**

511 The effects of swim bladder deflation were analyzed using logistic regression. Phonotaxis responses  
512 were categorized as 1 (correct localization) or 0 (incorrect) and fit to a logit function using a maximum  
513 likelihood method (Menard 2002). Logistic regression was also used to examine the effects of deflated  
514 swim bladders as compared to reinflated and sham deflated swim bladders. To analyze the movement of  
515 the fish, the difference angles of the bearing of the fish relative to the source and relative to the local  
516 sound field were determined. This was done by determining the position of the fish from the video record  
517 (at 150 ms intervals) and then calculating the fish's bearing between consecutive positional points. The  
518 difference angle relative to the source was the difference between the fish's bearing and the angle from  
519 the fish's position to the source and was calculated between each time step (150 ms) for all recorded  
520 behavioral tracks. The difference between the fish's bearing and the direction to the source was defined  
521 as the orientation error. Statistical analyses were performed to determine whether there were differences  
522 among the experimental groups in the difference angles at two specific points in the phonotactic pathway:  
523 (1) at the initial movement out of the release point (as defined as the vector between the first observed  
524 position outside the release cylinder and the fifth observed position) and (2) at the midpoint between the  
525 release point and the speaker.

526 As a measure of performance, the vector strength ( $r$ ) of the difference angles was computed.  
527 Vector strength is a measure of directional tendency or consistency toward the source (Batschelet, 1981);  
528 more formally, it is the normalized length of the mean vector of the circular distribution of angles to the  
529 source (the vector for each fish is unity length with the angle to the source, or in line with the particle  
530 motion vector). If all directions are equally likely, the vector strength is zero, whereas if all fish move in the

531 same direction, the vector strength is 1.0. Difference angles were tested for uniformity using a Hodges-  
532 Ajne test (Zar, 1999), which tests the null hypothesis that these angles are randomly distributed. A  
533 significant  $p$  value indicates a bias in the distribution of difference angles, i.e. the null hypothesis of equal  
534 (random) distribution is false. Differences between treatments were analyzed using a Watson-Williams  
535 test (the circular equivalent of a two sample t-test) (Watson and Williams, 1956), which analyzes whether  
536 two vectors have the same mean direction. The p-values were Bonferroni corrected to  $\alpha=0.025$  to reflect  
537 the tests conducted at two points in the phonotactic pathway. Though this test assumes that the data have  
538 an underlying von Mises unimodal distribution, the test is robust to deviations from this assumption (Zar,  
539 1999). All tests were conducted using the circular statistics toolbox (Berens, 2009) for Matlab version  
540 2009b (MathWorks, Natick, NJ).

541

542

543

#### **ACKNOWLEDGEMENTS**

544 We would like to thank Andrew Bass and Margaret Marchaterre for field assistance and logistical support,  
545 Edwin Rubel for microscopy support, and the University of California Bodega Marine Laboratory where  
546 these experiments were performed. We also thank two reviewers for feedback that greatly improved the  
547 manuscript.

548

#### **AUTHOR CONTRIBUTIONS**

549 A.B.C., D.G.Z., R.R.F., M.D.G., P.H.R. and J.A.S. conceived and designed the experiments. P.H.R. and  
550 M. D. G. are responsible for the analysis contained in the Supplementary Material. All authors collected  
551 and analyzed the data. All authors contributed to the draft and/or revision of this article.

552

553

#### **FUNDING**

554 This collaborative research was supported by the National Science Foundation (IOS-0642214 to J.A.S.  
555 and R.R.F).

556

557

#### **REFERENCES**

- 558 Bass, A. H. (1992). Dimorphic male brains and alternative reproductive tactics in a vocalizing fish. Trends  
559 in Neuroscience 15, 139-145.
- 560 Bass, A. H. (1996). Shaping brain sexuality. American Scientist 84, 352–363.
- 561 Bass, A. H. and Clark, C. W. (2003). The physical acoustics of underwater sound communication. In  
562 Acoustic Communication (ed. A. M. Simmons, R. R. Fay, and A. N. Popper), pp. 1-64. New York:  
563 Springer.
- 564 Bass, A. H., Bodnar, D. and Marchaterre, M. A. (1999). Complementary explanations for existing  
565 phenotypes in an acoustic communication system. In The Design of Animal Communication (ed.  
566 M. D. Hauser and M. Konishi) pp 493–514. Cambridge, MA:MIT Press.
- 567 Bass, A.H. and McKibben, J. R. (2003). Neural mechanisms and behaviors for acoustic communication in  
568 teleost fish. Progress in Neurobiology 69, 1-26.
- 569 Batchelet, E. (1981). The Rayleigh Test. In Circular Statistics in Biology (ed. E. Batchelet) pp. 54-58. New  
570 York: Academic Press.
- 571 Berens, P. (2009) CircStat: a Matlab toolbox for circular statistics. J. Statistical Software 31, 1-21.
- 572 Braun, C. B. and Coombs, S. (2000). The overlapping roles of the inner ear and lateral line: the active  
573 space of dipole source detection. Phil. Trans. Soc. Lond. B 355, 1115-1119.
- 574 Braun, C. B. and Coombs, S. (2010). Vibratory sources as compound stimuli for the octavolateralis  
575 system: dissection of specific stimulation channels using multiple behavioral approaches. J. Exp.  
576 Psych. 36, 243-257.
- 577 Braun, C. B., Coombs, S. and Fay, R. R. (2002). What is the nature of multisensory interaction between  
578 octavolateralis sub-systems? Brain, Behav, Evol. 59, 162-176.
- 579 Chapman, C.J. and Hawkins, A.D. (1973) A field study of hearing in the cod, *Gadus morhua* L. J. Comp.  
580 Physiol. A 85, 147-167.
- 581 Coombs, S., Braun, C. B. and Donovan, B. (2001). The orienting response of Lake Michigan mottled  
582 sculpin is mediated by canal neuromasts. J. Exp. Biol. 204, 337-348.
- 583 Coombs, S., Fay, R. R. and Elepfandt, A. (2010). Dipole source encoding and tracking by the goldfish  
584 auditory system. J. Exp. Biol. 213, 3536-3547.

- 585 Coombs, S., Gömer, P. and Münz, H. (1989). The Mechanosensory Lateral Line: Neurobiology and  
586 Evolution. New York, NY:Springer-Verlag.
- 587 Dijkgraaf, S. (1960). Hearing in bony fishes. *Proc. Roy. Soc. B* 152, 51-54.
- 588 Fay, R.R. (1984). The goldfish ear codes the axis of acoustic particle motion in three dimensions. *Science*  
589 225, 951-954.
- 590 Fay, R.R. (2005). Sound source localization by fishes. In *Sound Source Localization* (ed. A. N. Popper  
591 and R. R. Fay RR) pp 36–66. New York, NY:Springer-Verlag,
- 592 Fay, R.R. and Simmons, A.M. (1999) The sense of hearing in fish and amphibians. In *Comparative*  
593 *Hearing: Fish and Amphibians* (ed. R. R. Fay and A. N. Popper) pp 269-318. New York,  
594 NY:Springer-Verlag.
- 595 Hamilton, E. L. (1972) Compressional-wave attenuation in marine sediments. *Geophysics* 37, 620-646.
- 596 Harris, G.G. and van Bergeijk, W.A. (1962). Evidence that the lateral line organ responds to near-field  
597 displacements of sound sources in water. *J. Acoust. Soc. Am.* 34, 1831-1841.
- 598 Hawkins, A.D. and Sand, O. (1977). Directional hearing in the median vertical plane by the cod. *J. Comp.*  
599 *Physiol.* 122, 1-8.
- 600 Jensen, F.B., Kuperman, W.A., Porter, M.B. and Schmidt, H. (2011). *Computational Ocean Acoustics*  
601 (2nd Ed.) Eq. 2.205. New York: Springer
- 602 McKibben, J. R. and Bass, A. H. (1998). Behavioral assessment of acoustic parameters relevant to signal  
603 recognition and preference in a vocal fish, *J. Acoust. Soc. Am.* 104, 3520-3533.
- 604 McKibben, J. R. and Bass, A. H. (2001). Effects of temporal envelope modulation on acoustic signals in a  
605 vocal fish: harmonic and beat stimuli, *J. Acoust. Soc. Am.* 109, 2934-2943.
- 606 Menard, S. (2002). *Applied logistic regression analysis*. Sage University Papers Series on Quantitative  
607 Applications in the Social Sciences, 07-106. Thousand Oaks, CA: Sage.
- 608 Neuroth, I. E. and Mogdans, J. (2009). Goldfish and Oscars have comparable responsiveness to dipole  
609 stimuli. *Naturwissenschaften* 96, 1401-1409.
- 610 New, J. G. and Kang, P. Y. (2000). Multimodal sensory integration in the strike-feeding behavior of  
611 predatory fishes. *Phil. Trans. Soc. Lond. B* 355, 1321-1324.

- 612 Popper, A. N. and Coombs, S. (1982). The morphology and evolution of the ear in Actinopterygian fishes.  
613 Amer. Zool. 22, 311-328.
- 614 Popper, A. N. and Lu, Z. (2000) Structure-function relationships in fish otolith organs. Fisheries Res. 46,  
615 15-25.
- 616 Rogers, P. H., Popper, A. N., Hastings, M. C. and Saidel, W. M. (1988). Processing of acoustic signals in  
617 the auditory system of bony fish J. Acoust. Soc. Am. 83, 338-349 .
- 618 Rogers, P. H. and Cox, M. (1987). Underwater Sound as a Biological Stimulus. In Sensory Biology of  
619 Aquatic Animals (ed. J. Atema, R. R. Fay, A. N. Popper, W. N. Tavolga) pp. 131-149. New York:  
620 Springer Verlag.
- 621 Rogers, P. H. and Zeddies, D. G. (2008) Multipole mechanisms for directional hearing in fish. In Fish  
622 Bioacoustics (ed. J. F. Webb, A. N. Popper, R. R. Fay) pp.233-252. New York: Springer-Verlag.
- 623 Schellart, N. A. M. and Wubbels, R. J. (1998). The auditory and mechanosensory lateral line system. In  
624 The Physiology of Fishes, 2nd Ed. (ed. D. H. Evans) pp. 283-299. Boca Raton, FL: CRC Press  
625 LLC.
- 626 Schuijf, A. (1975). Directional hearing of cod (*Gadus morhua*) under approximate free field conditions. J.  
627 Comp. Physiol. A 98, 307-332.
- 628 Schuijf, A. and Buwalda, R. J. A. (1975). On the mechanism of directional hearing in cod (*Gadus*  
629 *morhua*). J. Comp. Physiol. A 98, 333-344.
- 630 Schuijf, A. and Hawkins, A.D. (1983) Acoustic distance discrimination by the cod. Nature 302, 143-144.
- 631 Sisneros, J.A., Alderks, P.W., Leon, K. and Sniffen, B. (2009). Morphometric changes associated with the  
632 reproductive cycle and behaviour of the intertidal-nesting, male plainfin midshipman fish,  
633 *Porichthys notatus*. J. Fish Biol. 74,18-36.
- 634 Van Bergeijk, W. A. (1967). The evolution of vertebrate hearing. In Contributions to Sensory Physiology  
635 (ed. W. D. Neff) pp. 1-49. New York: Academic Press.
- 636 Vries, H.L. de (1950). "The mechanics of the labyrinth otoliths", Acta Oto Laryngol. 38, 262 273.
- 637 Watson, G. S. and Williams, E. J. (1956). On the construction of significance tests on the circle and the  
638 sphere. Biometrika 43, 344-352.

- 639 Webb, J. F., Montgomery, J. C. and Mogdans, J. (2008). Bioacoustics and the lateral line system of  
640 fishes. In Fish Bioacoustics (ed. J. F. Webb, A. N. Popper and R. R. Fay RR) pp 145-182. New  
641 York, NY:Springer-Verlag.
- 642 Weeg, M. S. and Bass, A. H. (2002). Frequency response properties of lateral line superficial neuromasts  
643 in a vocal fish, with evidence for acoustic sensitivity. J. Neurophysiol. 88, 1252-1262.
- 644 Wysocki, L.E., Montey, K., and Popper, A. N. (2009). The influence of ambient temperature and thermal  
645 acclimation on hearing in a eurythermal and a stenothermal otophysan fish. J. Exp. Biol. 212,  
646 3091-3099.
- 647 Zar, J. H. (1999). Biostatistical Analysis, 4th ed Upper Saddle River, NJ: Prentice Hall.
- 648 Zeddies, D. G., Fay, R. R., Alderks, P. W., Shaub, K. S. and Sisneros, J. A. (2010). Sound source  
649 localization by the plainfin midshipman fish, *Porichthys notatus*. J. Acoust. Soc. Amer. 127, 3104-  
650 3113.
- 651 Zeddies, D. G., Fay, R. R., Gray, M. D., Alderks, P. W., Acob, A. and Sisneros, J. A. (2012). Local  
652 acoustic particle motion guides sound source localization behavior in the plainfin midshipman  
653 fish, *Porichthys notatus*. J. Exp. Biol. 215, 152-160

654  
655  
656  
657  
658  
659  
660  
661  
662  
663  
664  
665



666 **Table 1.** Quantification of FM-labelled SN from 6 regions of liquid N<sub>2</sub>-ablated fish (n = 9). Data are  
667 represented as the number and percentage of intact SN (as visualized with FM) relative to the total  
668 number of SN. Neuromast position was determined by epithelial morphology (e.g., fleshy papillae) and  
669 pigmentation differences as compared to the surrounding non-sensory areas, allowing for unambiguous  
670 identification of SN even in the absence of FM labelling. Data for sham-ablated animals are not shown but  
671 missing neuromasts were rarely seen in these animals (0-2 unlabelled SN per fish).

672 \*ablated fish that did not localize the sound source.

673 \*\* phonotactic response, FM labelling, and sacrifice occurred one day post-ablation.

674

675

676

677

678

679

680

681

682

683

684

685

686

687  
688  
689  
690  
691  
692  
693  
694  
695  
696  
697  
  
698  
699  
700  
701  
702  
703  
704  
705  
706  
707  
708

| Fish  | Dorsal line |       | Top of head |       | Ventral line |       | Mandible   |       | Caudal fin |       | Operculum  |       | Total      |       |
|-------|-------------|-------|-------------|-------|--------------|-------|------------|-------|------------|-------|------------|-------|------------|-------|
|       | Intact (%)  | Total | Intact (%)  | Total | Intact (%)   | Total | Intact (%) | Total | Intact (%) | Total | Intact (%) | Total | Intact (%) | Total |
| 376   | 3 (3.9%)    | 76    | 0 (0%)      | 13    | 0 (0%)       | 43    | 9 (22.5%)  | 40    | 23 (33.8%) | 68    | 3 (21.4%)  | 14    | 38 (15.0%) | 254   |
| 377   | 16 (20.8%)  | 77    | 0 (0%)      | 9     | 7 (14%)      | 50    | 28 (65%)   | 43    | 10 (40%)   | 25    | 1 (6.7%)   | 15    | 62 (28.3%) | 219   |
| 391*  | 0 (0%)      | 88    | 0 (0%)      | 10    | 5 (15.6%)    | 32    | 16 (57.1%) | 28    | 14 (29.8%) | 47    | 3 (23.1%)  | 13    | 38 (17.4%) | 218   |
| 392*  | 0 (0%)      | 73    | 4 (40%)     | 10    | 3 (7.1%)     | 42    | 11 (33.3%) | 33    | 2 (5.3%)   | 38    | 0 (0%)     | 12    | 20 (9.6%)  | 208   |
| 432   | 4 (5.2%)    | 77    | 1 (7.1%)    | 14    | 0 (0%)       | 49    | 23 (52.3%) | 44    | 0 (0%)     | 32    | 1 (5.5%)   | 18    | 29 (12.4%) | 234   |
| 433** | 5 (5.5%)    | 90    | 0 (0%)      | 13    | 1 (2.1%)     | 47    | 16 (40%)   | 40    | 13 (31.7%) | 41    | 0 (0%)     | 15    | 35 (14.2%) | 246   |
| 441   | 4 (4.5%)    | 89    | 0 (0%)      | 8     | 0 (0%)       | 50    | 9 (31.0%)  | 29    | 28 (70%)   | 40    | 1 (5.9%)   | 17    | 42 (18.0%) | 233   |
| 447   | 2 (2.8%)    | 70    | 0 (0%)      | 10    | 10 (20.0%)   | 50    | 8 (22.2%)  | 36    | 33 (78.6%) | 42    | 0 (0%)     | 18    | 53 (23.4%) | 226   |
| 449   | 1 (1.6%)    | 62    | 0 (0%)      | 11    | 0 (0%)       | 24    | 10 (26.3%) | 38    | 0 (0%)     | 27    | 1 (6.7%)   | 15    | 12 (6.7%)  | 177   |

709

710

711

712

713

714

715 **Figure Legends**

716

717 Fig. 1. Schematic of the experimental setup (tank diameter = 4 meters; water depth = 50 cm) showing the  
718 monopole sound source (Lubell AQ339, Clark Synthesis, Littleton, CO, USA or a US Navy J-9  
719 transducer), the opaque screen and the animal release sites (A and B).

720

721 Fig. 2. Phonotactic response pathways of reproductive female midshipman fish that underwent swim  
722 bladder deflation surgery. (A) Response pathways of females with sham-deflated swim bladders that  
723 exhibited positive (green circle) phonotaxis and negative (red circle) responses to the simulated  
724 advertisement call stimulus. (B) Response pathways of females with deflated and re-inflated swim  
725 bladders (see Results) that exhibited positive phonotaxis with either deflated (green circle) or re-inflated  
726 (blue triangle) swim bladders and negative responses with either deflated (red square) or re-inflated  
727 (orange diamond) swim bladders. The axes are the distance from the center of the tank in cm where the  
728 monopole J-9 speaker (black square) was located and the dotted line represents the position of the  
729 opaque screen.

730

731 Fig. 3: Schematic illustration of the plainfin midshipman fish lateral line mechanosensory system (adopted  
732 from Greene, 1899). All illustrated neuromasts and several stitches not illustrated (SN primarily on the  
733 head and underbelly) were targeted for ablation. Four regions of SN were selected for phalloidin labelling  
734 (neuromasts filled in black): a 2 cm region from the right dorsal line starting at the anterior edge of the  
735 dorsal fin (SN 1), a 1 cm region on the top of the head (left side; SN 2), 1.5-2 cm from the ventral line (left  
736 side) starting at the anterior edge of the anal fin (SN 3), and the entire caudal fin (SN 4). Given the small

737 number of CN in this species, all canals were dissected from the head and labelled rather than selecting  
738 discrete CN regions for sub-sampling (CN, arrows; neuromasts within canals not illustrated).

739

740

741 Fig. 4. DASPEI labelling of neuromasts in live, anesthetized female midshipman. Images are from the  
742 dorsal lateral line that runs along the base of the dorsal fin. (A) Intact animal, (B) sham-operated animal  
743 (ventral photophores ablated), (C) lateral line ablation performed same day, (D) lateral line ablation  
744 performed one day prior to behavioral testing and imaging. Arrows in C and D delineate examples of  
745 neuromast locations. Arrowheads in B and D indicate photophores, which are autofluorescent. Scale bar  
746 in A is 500  $\mu\text{m}$  and applies to all panels.

747

748 Fig. 5. FM 1-43FX-labelled neuromasts in fixed animals. Images are from the ventromedial surface  
749 between the pectoral fins. (A) Intact animal, (B) sham-operated animal, (C-D) lateral line ablation  
750 performed same day, (E) lateral line ablation performed one day prior to behavioral testing and imaging.  
751 White arrows in C-E show examples of neuromast locations where all hair cells were successfully  
752 ablated. Black arrows in D point to remaining neuromasts in a fish subjected to liquid  $\text{N}_2$  ablation. Scale  
753 bars = 500  $\mu\text{m}$ .

754

755 Fig. 6. Phalloidin-labelled neuromasts from intact (A-C) and ablated (D-F) animals. (A) Low-magnification  
756 image of a ventral SN showing intact papillae. The neuromast between these structures is indicated with  
757 an arrow and is shown at higher magnification in (B). (C) Intact CN with a full complement of hair bundles.  
758 (D) Low magnification image of a damaged ventral SN. The papillae are still present but appear  
759 damaged. The arrow indicates the position of the ablated neuromast, which is shown in higher  
760 magnification in (E). (F) Liquid  $\text{N}_2$ -ablated CN. The arrowhead marks scattered hair bundle remnants.  
761 Scale bar = 100  $\mu\text{m}$  in A, D; = 10  $\mu\text{m}$  in B, E; = 30  $\mu\text{m}$  in C, F.

762

763 Fig. 7. Phonotactic response pathways of reproductive female midshipman fish with ablated- and sham  
764 ablated lateral line systems. Positive response pathways of females with ablated lateral line systems (A)

765 and sham ablated lateral line systems (B) are colored green and negative responses are colored red. The  
 766 axes are the distance from the center of the tank in cm where the monopole AQ 339 speaker (black  
 767 circle) was located and the dotted line represents the position of the opaque screen.

768

769

770

771 Supplementary Materials: Resolving the 180° ambiguity.

772

773 The field of a point monopole in a free-field is an archetype for the directionalization problem. It is the  
 774 simplest possible case, yet one which occurs often in nature. It would be expected that any method that  
 775 a fish might use to resolve the ambiguity would have to work for this case to be of general use. The  
 776 mathematics can be simplified further by assuming that the signal is sinusoidal. This is a good  
 777 approximation for the advertisement call of the midshipman and was exactly the case in our experiment.  
 778 We focus here on the directionalization cues present in the stimulus, not on the algorithm employed by  
 779 fish such as those proposed by Rogers et al (1988) or Schuijff and Buwalda (1975). Any proposed  
 780 algorithm must exploit these cues. We assume therefore that the fish can detect both the acoustic  
 781 particle velocity vector (relative to its own body axis) as well as the acoustic pressure. We also assume  
 782 that the discrimination is to be made by simultaneous sensing both quantities at the same point in the  
 783 water. For a sinusoidal signal the only parameters that can be measured are the amplitude and phase of  
 784 the two field quantities.

785 Consider a point monopole source, oscillating at angular frequency  $\omega$ , located at the origin of a spherical  
 786 coordinate system. Using complex notation, the acoustic pressure at a distance  $r$  from the source is  
 787 given by

$$788 \quad p(r, t) = \text{Re} \left[ \hat{p}(r) e^{-i\omega t} \right] = \text{Re} \left[ \hat{p}_0 \frac{r_0 e^{ikr}}{r} e^{-i\omega t} \right] \quad (1)$$

789 where  $\hat{p}(r)$  is the complex amplitude of the received acoustic pressure,  $\hat{p}_0$  is the complex source  
 790 level of the source,  $k (= \omega / c)$  is the wavenumber,  $r_0$  is some reference distance and  $\text{Re}$  denotes the  
 791 real part of the complex quantity in brackets.

792 From Euler's equation, the acoustic particle velocity in the radial direction is given by

793 
$$v_r(r, t) = \text{Re} \left[ \hat{v}_r(r) e^{-i\omega t} \right] = \text{Re} \left[ \frac{\hat{p}_0}{\rho c} \left( 1 + \frac{i}{kr} \right) \frac{r_0 e^{ikr}}{r} e^{-i\omega t} \right] \quad (2)$$

794 where  $\hat{v}_r(r)$  is the complex amplitude of the radial particle velocity and  $\rho$  and  $c$  are the density and  
795 speed of sound in water.

796

797 From Eqs 1 and 2, it is evident that the complex radial velocity is proportional to the complex acoustic  
798 pressure:

799 
$$\hat{v}_r(r) = \left[ \frac{1}{\rho c} \left( 1 + \frac{i}{kr} \right) \right] \hat{p}(r) \quad (3)$$

800 The quantity in brackets is the acoustic admittance, the inverse of the acoustic impedance. The real part  
801 of the term in brackets is proportional to the component of the radial velocity that is in phase with the  
802 pressure (the far-field component) and the second term is proportional to the component in quadrature  
803 with the pressure (the near-field component). The sign of the real part is certain but the sign of the  
804 imaginary part is actually unknown since it depends on the true phase of the source, which is unknown.

805 This can be seen by noting that the sign of the imaginary term in Eq. 3 would be negative if an  $e^{i\omega t}$   
806 time dependence was used rather than the  $e^{-i\omega t}$  time dependence that was used in Eq. 1.

807 The acoustic power density (intensity) which given by  $\vec{I} = p\vec{v}$  consists of a radiated term, which has a  
808 nonzero time average and a reactive part with zero time average. The general expression time averaged  
809 radial intensity is given by

810 
$$\langle I_r \rangle = \frac{1}{2} \text{Re} \left[ \hat{p}(r) \hat{v}_r(r)^* \right] \quad (4)$$

811 Substituting Eq 3 in Eq 4, the radiated power for the free-field point monopole is given by

812 
$$\langle I_r \rangle = \frac{r_0^2}{2\rho c r^2} |\hat{p}_0|^2 \quad (5)$$
  
814

815 Note that  $\langle I_r \rangle$  is always positive, indicating power being radiated away from the source. Normalizing this  
816 quantity by the magnitude of  $I_r$ , we get a localization metric which we will designate by  $\Gamma(r)$  which is  
817 given by

818 
$$\Gamma(r) = \frac{(kr)^2}{\sqrt{1+(kr)^2}} \quad (6)$$

819  
820 for the free-field point source, which always falls between 0 and +1, while for an  
821 arbitrary field

822 
$$\Gamma(r) = \frac{\text{Re}(\hat{p}(r)\hat{v}_r(r)^*)}{|\hat{p}(r)\hat{v}_r(r)|} \quad (7)$$

824  
825 which must fall somewhere between -1 and +1, with positive values corresponding to a sound  
826 propagating in the positive  $r$  direction and negative values corresponding to sound propagating in the  
827 negative  $r$  direction. The discrimination between plus and minus becomes increasingly difficult as the  
828 value of  $\Gamma$  approaches 0.

829 The fish measures particle velocity in its own body-centered coordinate system. For simplicity, assume  
830 that the fish is oriented so that its rostral-caudal acoustic axis is aligned with a radial to the source. The  
831 measured particle velocity is

832 
$$\hat{v}_m(r) = \pm \hat{v}_r(r) \quad (8)$$

833 The sign ambiguity in Eq 4, which reflects the 180° ambiguity, occurs because the positive rostral-caudal  
834 axis may be pointing towards or away from the source. If the positive direction for the measured particle  
835 velocity is toward the tail of the fish then positive sign in Eq 4 corresponds to the fish being oriented with  
836 its head towards the source and the negative sign corresponds to the fish being oriented with its tail  
837 towards the source. Using this choice of sign we get

838 
$$(9) \quad \Gamma_m(r) = \frac{\text{Re}(\hat{p}_m(r)\hat{v}_m(r)^*)}{|\hat{p}_m(r)\hat{v}_m(r)|}$$

839  
840 where  $\hat{p}_m(r)$  and  $\hat{v}_m(r)$  are measured (or modeled) values of pressure and particle velocity at a point  $r$ .  
841 There are many possible ways in which  $\Gamma_m(r)$  could be evaluated in practice.

842 In figures S1 and S2 we plot the metric,  $\Gamma_m(r)$ , at 80 Hz, for five cases, (1) a point source located at  $r=0$ ,  
843 (2) the field as measured in the Bodega Bay tank, and cases based on the results from a “method of  
844 images” propagation model ( Jenson et al, 2011) in .5 m deep water with source and receiver located  
845 .05m from the bottom with three acoustically fast bottom types, (3) gravel, (4) fine sand and (5) sandy silt,  
846 with sediment parameters derived from Hamilton, 1972. Figure S1 gives the results out to 5m from the  
847 source and Fig. S2 gives the results out to 100 m from the source. It is clear from Figure S1 that if a fish

848 responded correctly to a free-field source, it would respond in the wrong direction in the Bodega Bay tank.  
849 Propagation models for the nesting environment indicate that close to the source a fish which would  
850 respond the correctly to a free-field source, would respond in the wrong direction for ranges from a  
851 centimeter out to 25-50 m from the source depending on bottom type. At large ranges the theory  
852 indicates the fish would respond in the correct direction. This latter conclusion would be tempered by the  
853 fact that the pressure 100m from the source is 60dB lower than it is at 1 meter and that the depth of the  
854 water is unlikely to remain at 0.5 m at that distance.

855 Since the female midshipman in fact responds in the correct direction in the tank and likely does so in the  
856 nesting environment as well, we conclude that she must either alter her localization method when seeking  
857 males or is unable to correctly resolve the 180° ambiguity in deep water.

858

## 859 References

860 Hamilton, E. L. (1972) Compressional-wave attenuation in marine sediments. *Geophysics* 37, 620-646.

861 Rogers, P. H., Popper, A. N., Hastings, M. C. and Saidel, W. M. (1988). Processing of acoustic signals in  
862 the auditory system of bony fish *J. Acoust. Soc. Am.* 83, 338-349.

863 Schuijff, A. and Buwalda, R. J. A. (1975). On the mechanism of directional hearing in cod (*Gadus*  
864 *morhua*). *J. Comp. Physiol. A* 98, 333-344.

865

## 866 Supplemental Figures

867

868 Fig. S1. Comparison of the localization metric  $\Gamma_m$ , at 80 Hz, as given in Eq. 9 (see discussion), as a  
869 function of range out to 5 m from the source for a free-field point source (black), for the measured field in  
870 the Bodega Bay tank (cyan), and for modeled results for 0.5 m deep water, with source and receiver 0.05  
871 m from the bottom, and with three different sediment types: gravel (blue), fine sand (green) and sandy silt  
872 (red). It would be expected that positive values for  $\Gamma_m$  would indicate the source to be located at  $r = 0$  and  
873 negative values would indicate that the source is located in the opposite direction.

874

875 Fig. S2. Comparison of the localization metric  $\Gamma_m$ , at 80 Hz, as given in Eq. 9 (see discussion), as a  
876 function of range out to 100 m from the source for a free-field point source (black), for the measured field  
877 in the Bodega Bay tank (cyan), and for modeled results for 0.5 m deep water, with source and receiver 0



878 .05 m from the bottom, and with three different sediment types: gravel (blue), fine sand (green) and sandy  
879 silt (red). It would be expected that positive values for  $\Gamma$  would indicate the source to be located at  $r = 0$   
880 and negative values would indicate that the source is located in the opposite direction  
881

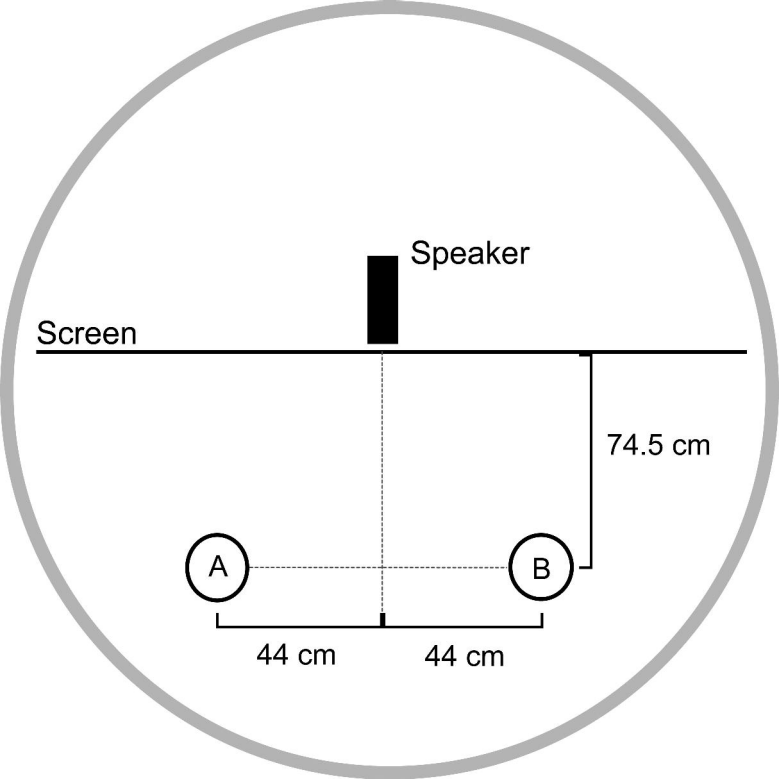

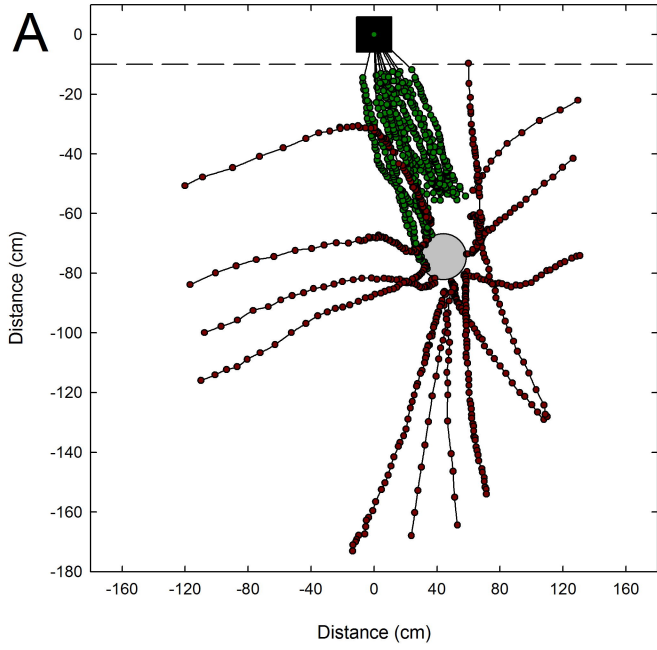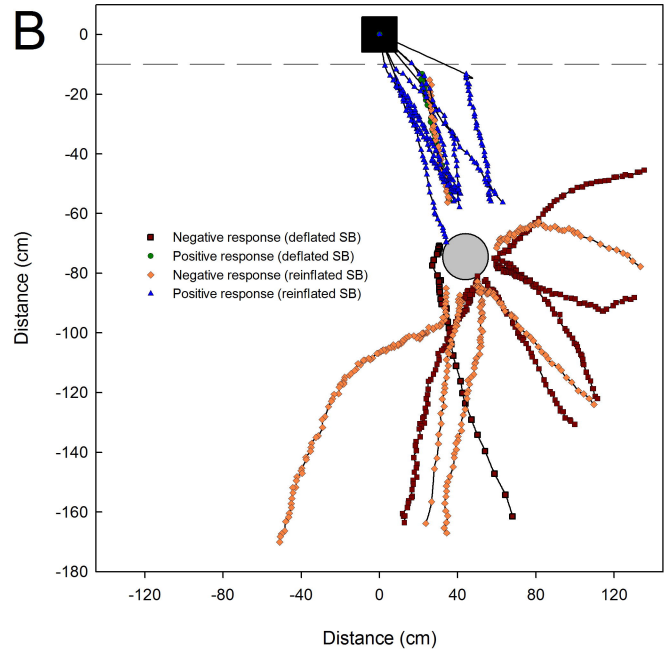

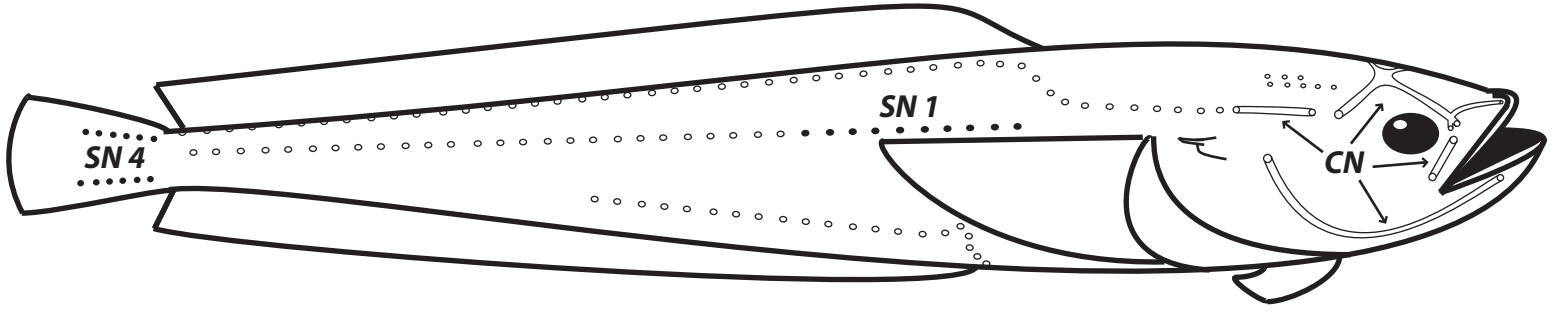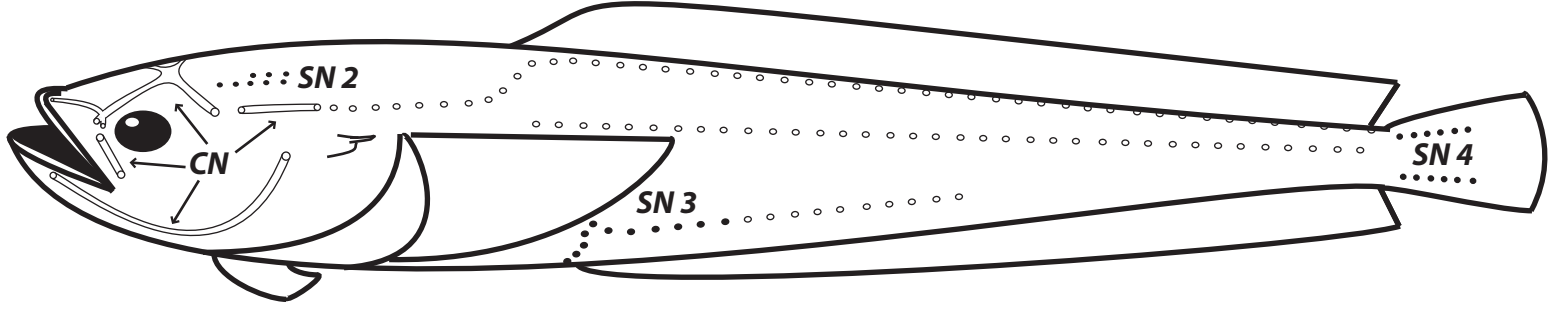

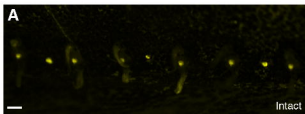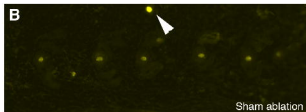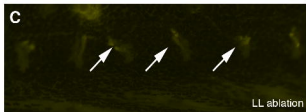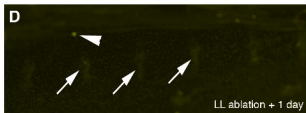

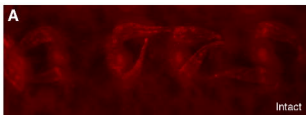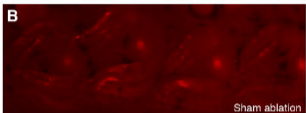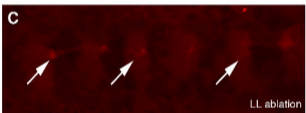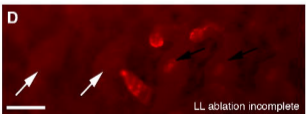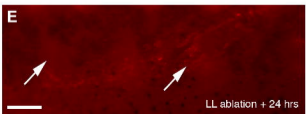

Intact

Damaged

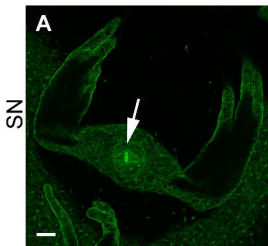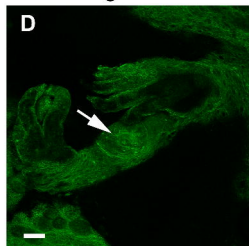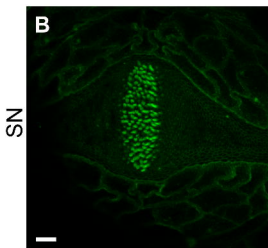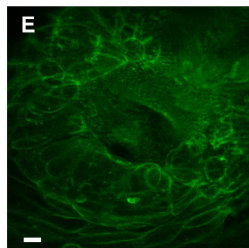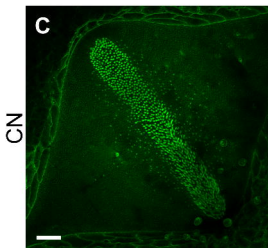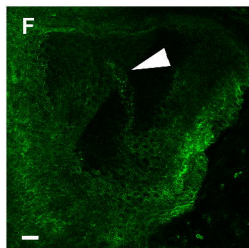

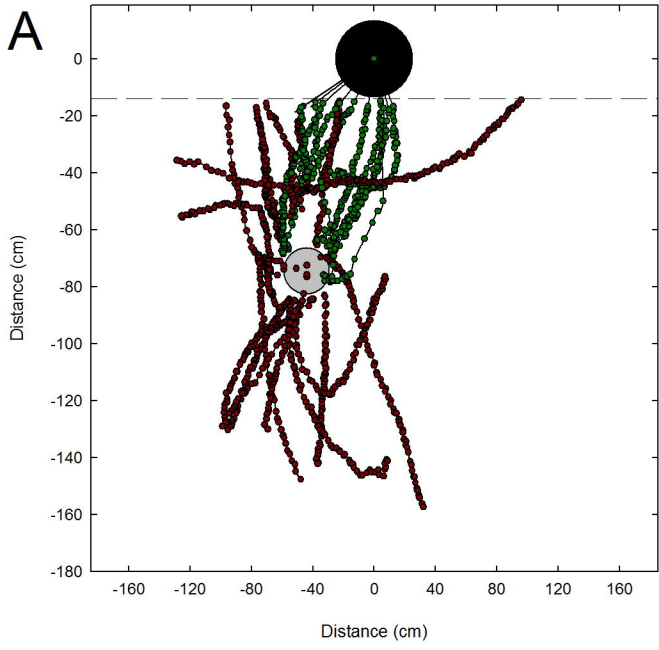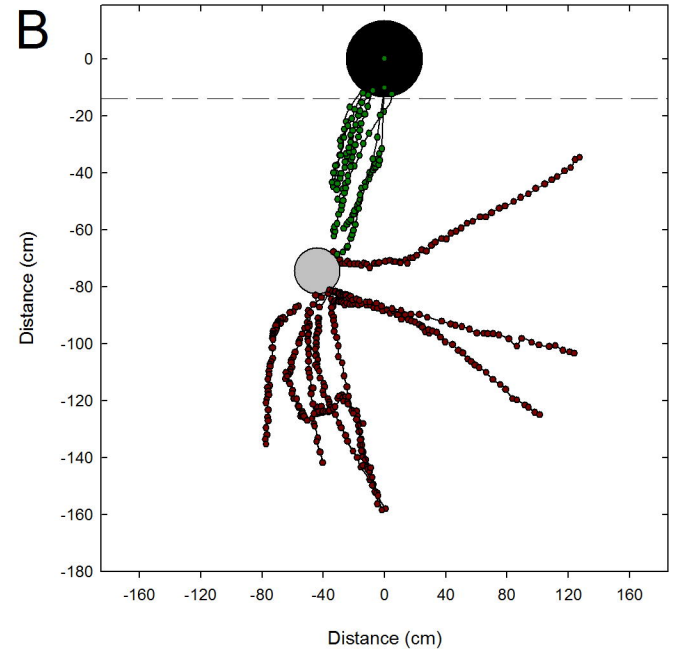

Source: https://cob.silverchair.com/jeb/article-pdf/doi/10.1242/jeb.093831/2037590/jeb_093831.pdf
